# Supplementary material for: Up-regulation of CD44 in the development of metastasis, recurrence and drug resistance of ovarian cancer
Source: PubMed Central journal article supplement (PMC4496219; doi:10.18632/oncotarget.3220), 2015-03-13
Supplement: oncotarget-06-9313-s001.pdf [file oncotarget-06-9313-s001.pdf]

## SUPPLEMENTARY TABLE

Supplementary Table S1: Clinical Information of Ovarian Cancer Tissue Microarray

|                                   |                   | Primary | Metastatic | Recurrent |
|-----------------------------------|-------------------|---------|------------|-----------|
| <b>FIGO Stage</b>                 | III               | 15      |            |           |
|                                   | IV                | 11      |            |           |
| <b>Grade</b>                      | 1                 | 1       |            |           |
|                                   | 2                 | 4       |            |           |
|                                   | 3                 | 21      |            |           |
| <b>Histological Types</b>         | Serous            | 18      | 18         | 17        |
|                                   | Endometrioid      | 1       | 1          | 1         |
|                                   | Transitional Cell | 1       | 1          | 1         |
|                                   | Mixed Types       | 5       | 5          | 4         |
|                                   | Others/Unknown    | 1       | 1          | 3         |
| <b>Ascites Present at Surgery</b> | Yes               | 17      |            |           |
|                                   | No                | 9       |            |           |
